# Supplementary material
Source: publisher figshare collection journal article supplement (https://aacr.figshare.com/articles/dataset/_/22490221)

CDCP1  
Seiler data

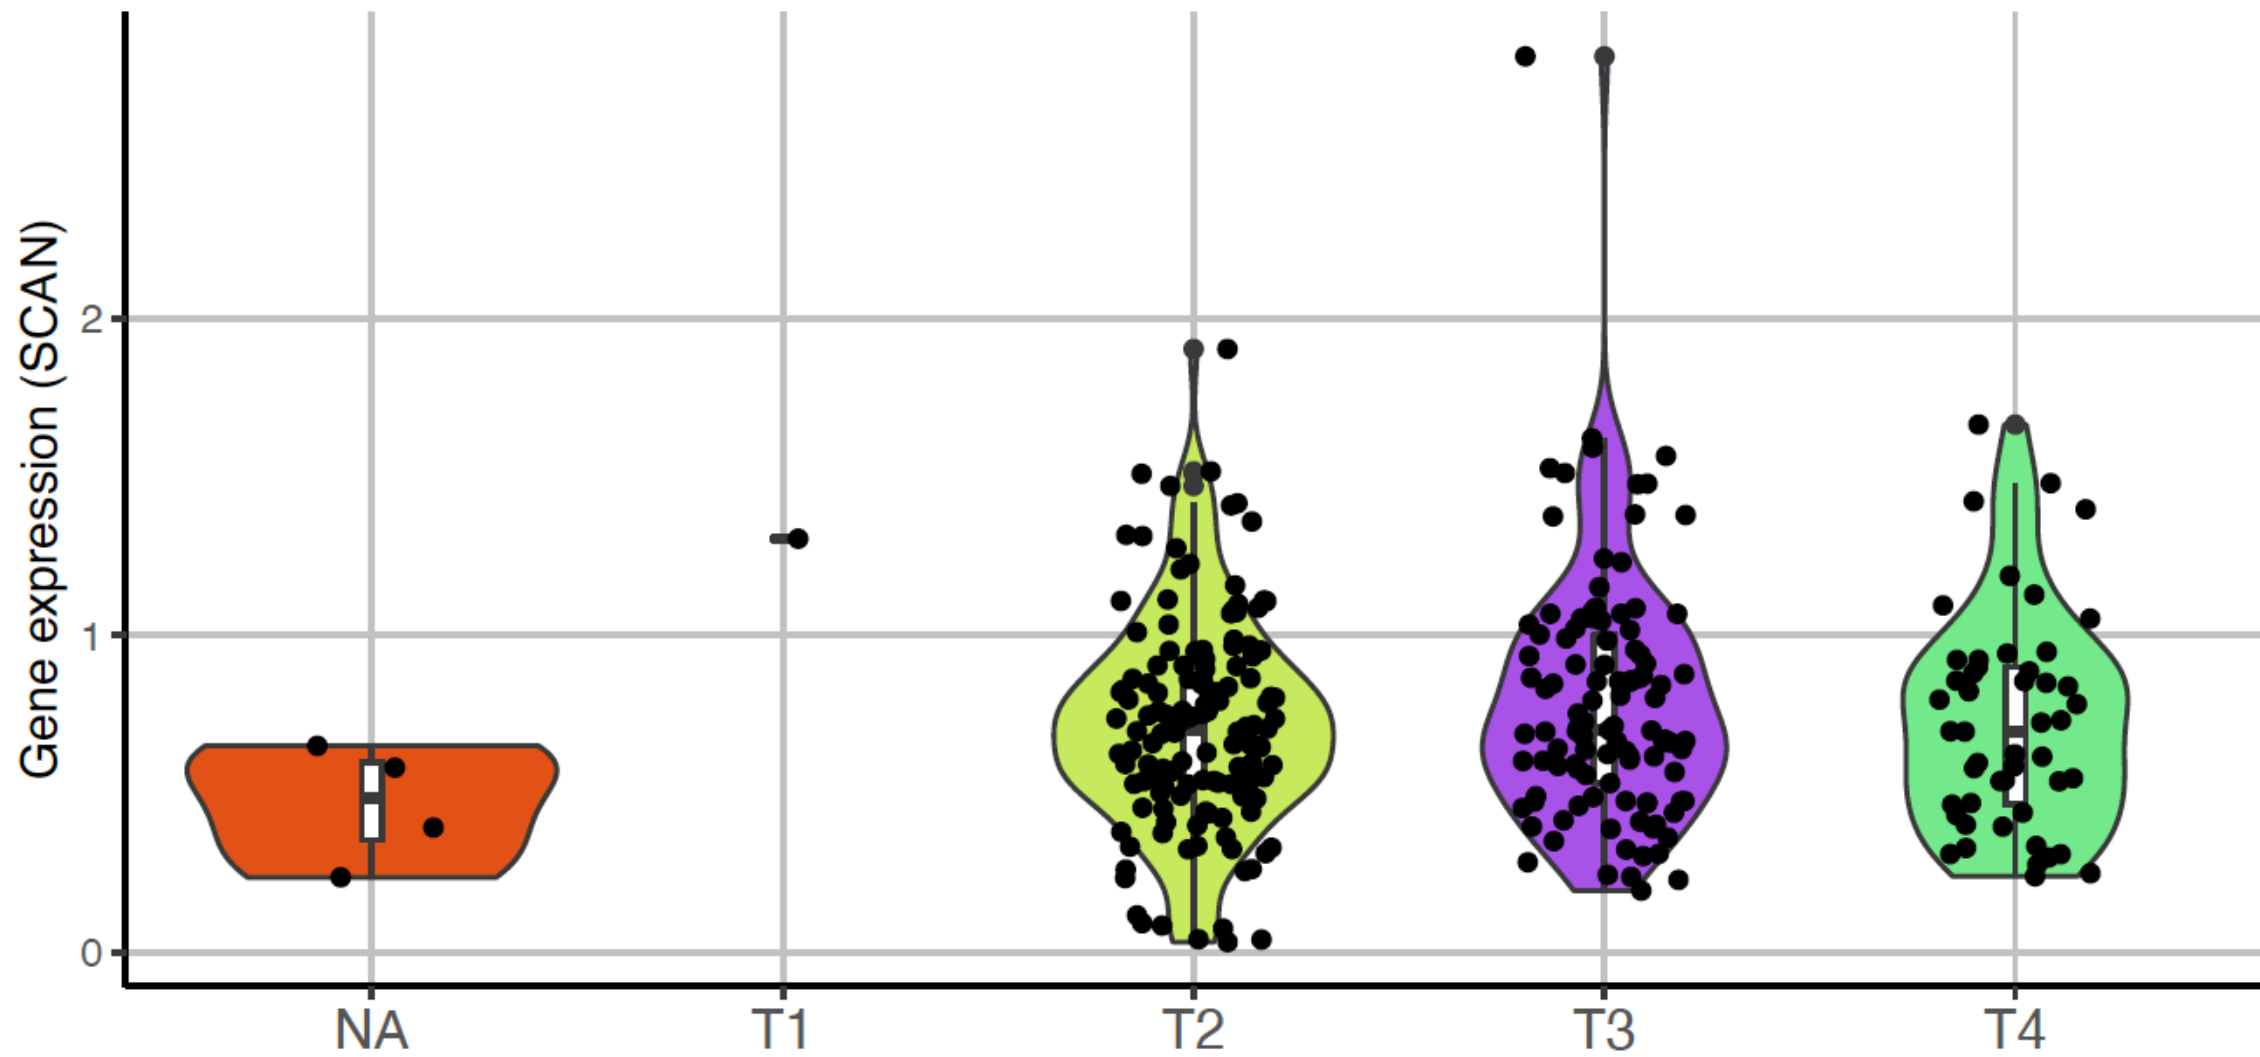

Supplement: Supplementary file 1 [file 39941851]
